# Supplementary material for: Tapping into the maize root microbiome to identify bacteria that promote growth under chilling conditions
Source: PubMed Central journal article supplement (PMC7166315; doi:10.1186/s40168-020-00833-w), 2020-04-18
Supplement: 40168_2020_833_MOESM1_ESM.pdf [file 40168_2020_833_MOESM1_ESM.pdf]

## SUPPORTING INFORMATION

**Fig. S1.** Differences in the relative abundances between experiments I and II of the phylum *Actinobacteria* and the family *Streptomyetaceae*. The relative abundance (%) of the *Actinobacteria* ASVs that are assigned to the *Streptomyetaceae* family in both experiments are shown in the bottom panel.

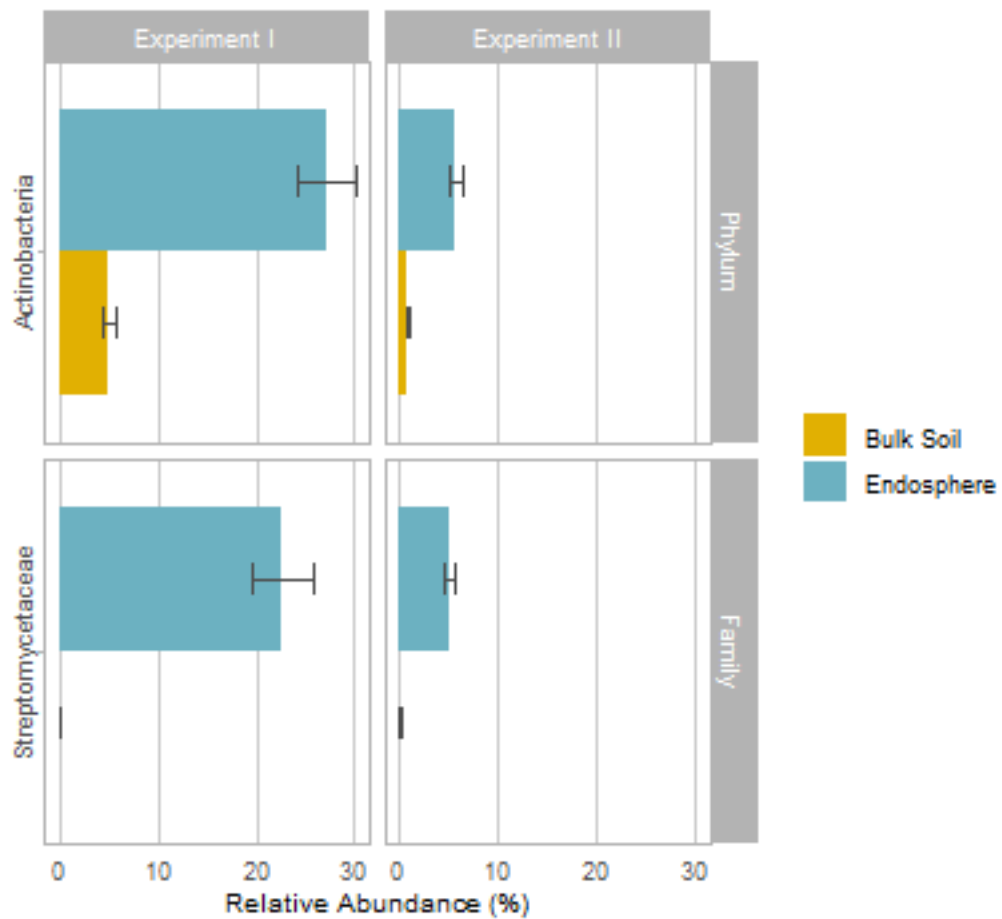

**Fig. S2.** Shannon diversity indices (effective number of species) accounting for the within-sample diversity of the different sample types (all experiments) and between temperature conditions (experiments IV and V).

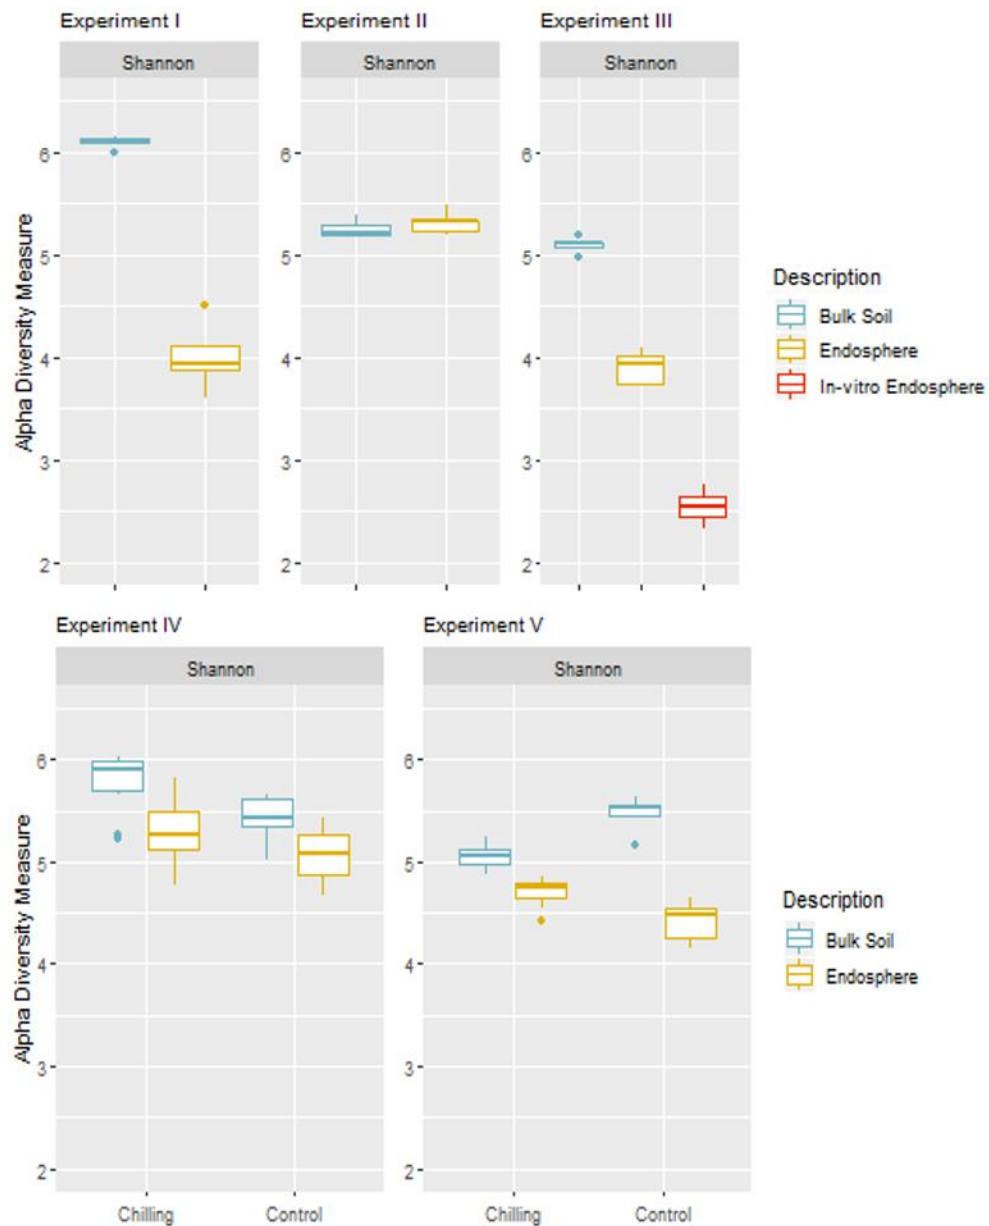

**Fig. S3.** Principal coordinate analysis of the microbial communities of bulk soil and endosphere in both chilling and control temperatures (experiments IV and V). PCoA plots are based on Bray-Curtis dissimilarity indices.

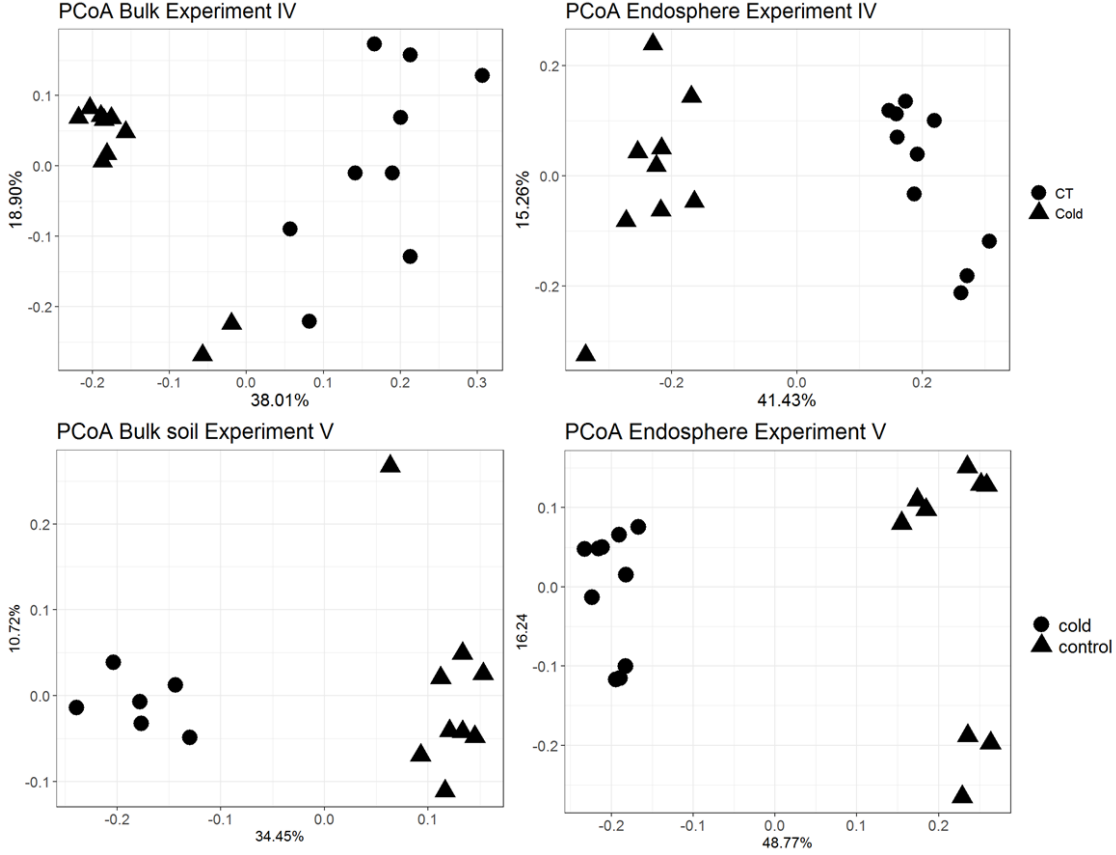

**Fig. S4.** Screening of isolates of the bacterial collection. In total, 28 different bacterial strains were screened for their effect on juvenile maize growth under chilling temperature conditions. The effect of the bacterial isolates on the total (shoot and root) fresh weight (in g) was tested in different repeats. The white and grey boxes represent the mock-inoculated and bacteria-inoculated plants, respectively. Individual datapoints are presented as black dots. For the statistical analysis and taxonomy of the bacterial isolates, see Table S9.

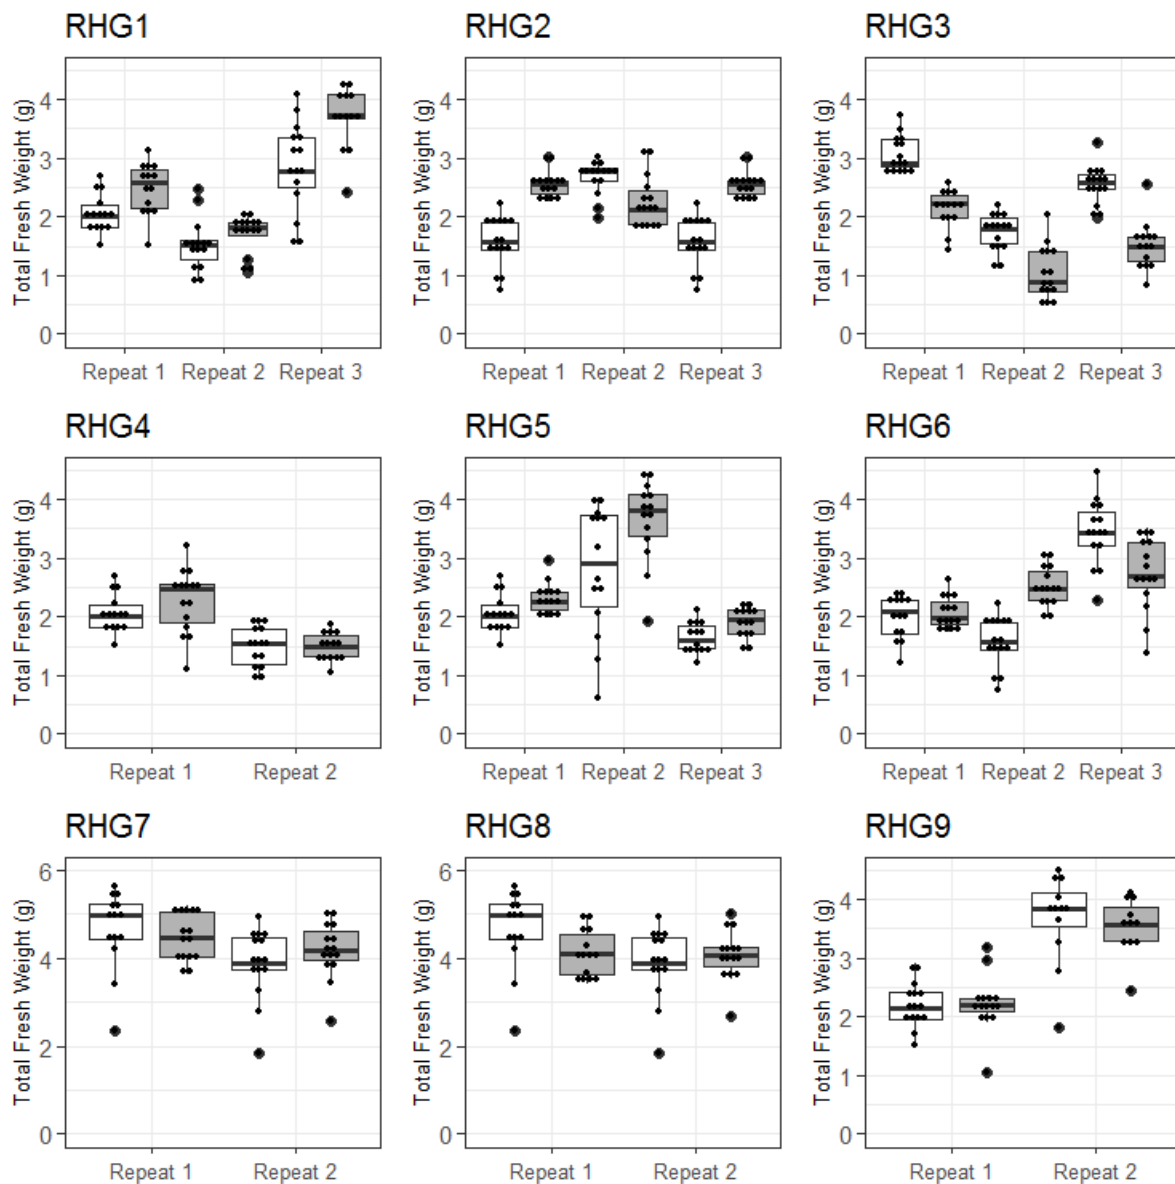

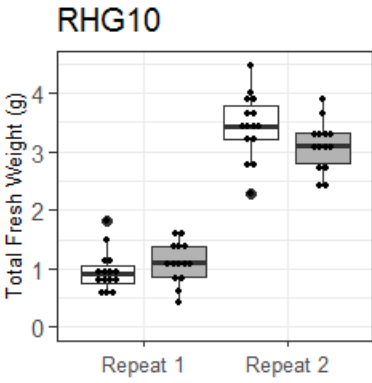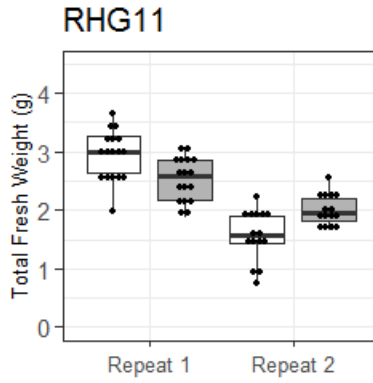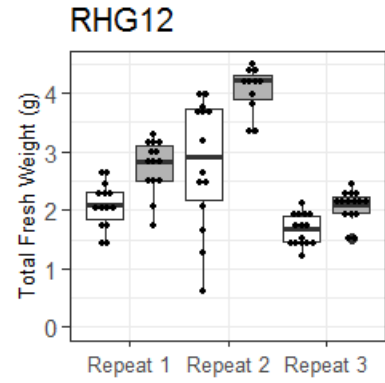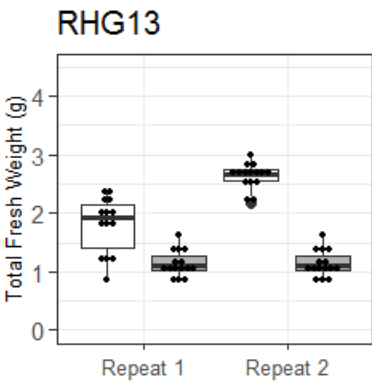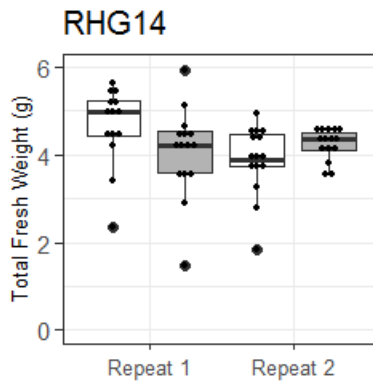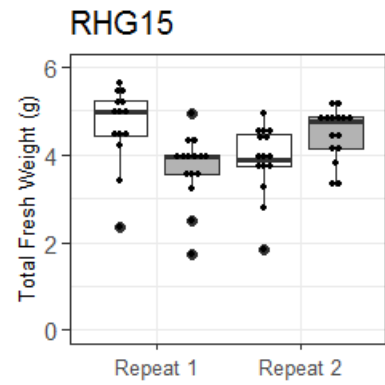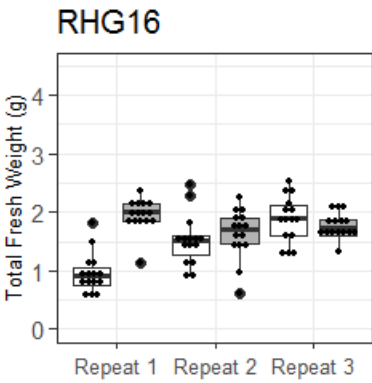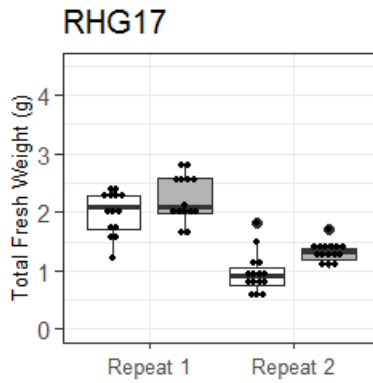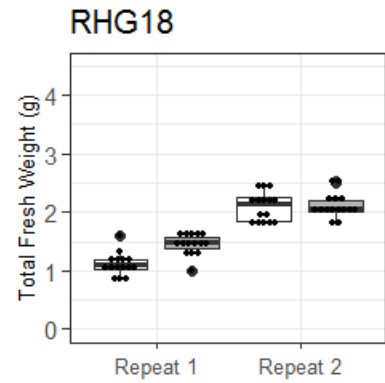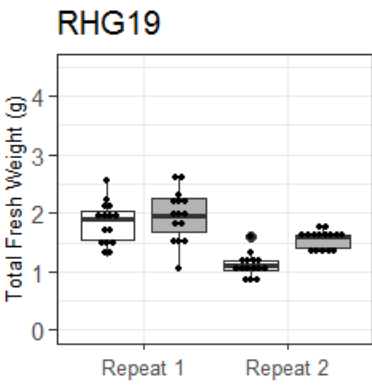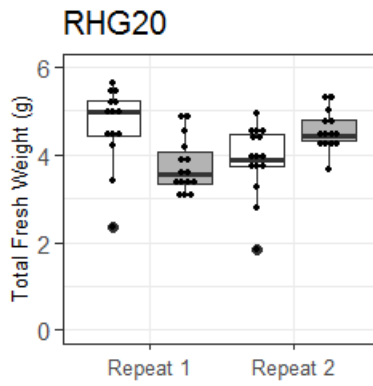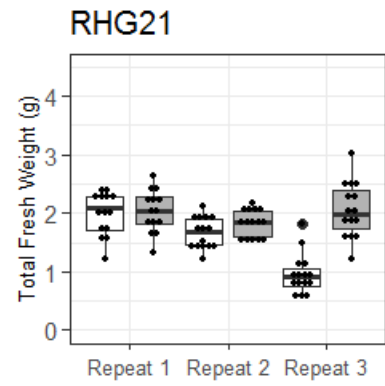

RHG22

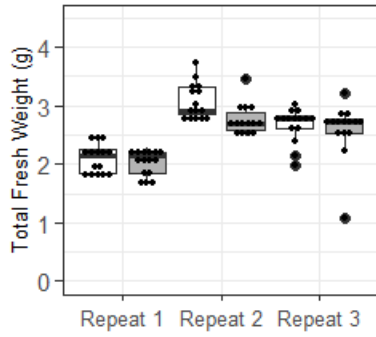

RHG23

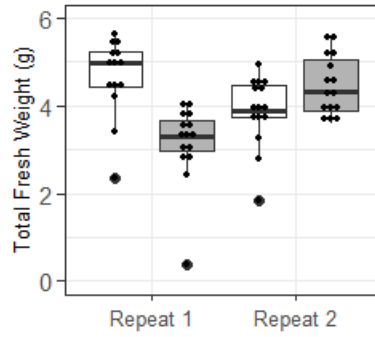

RHG24

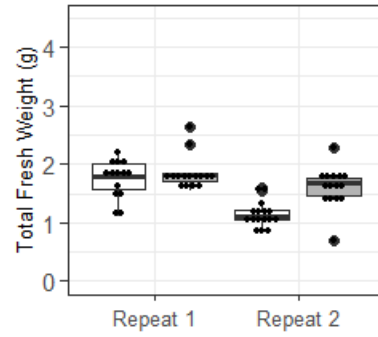

RHG25

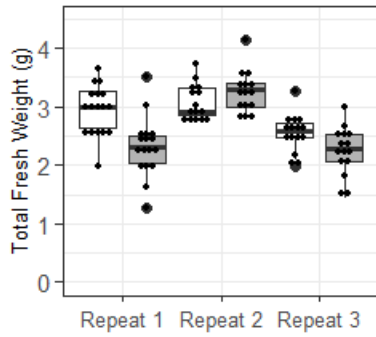

RHG26

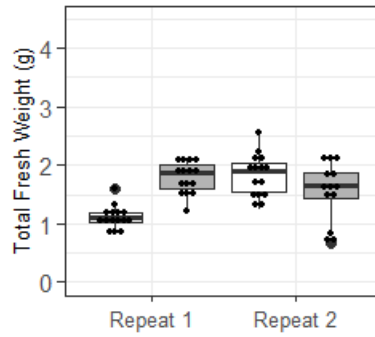

RHG27

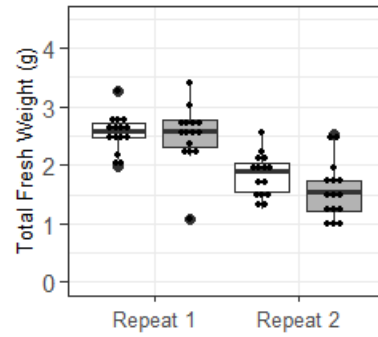

RHG28

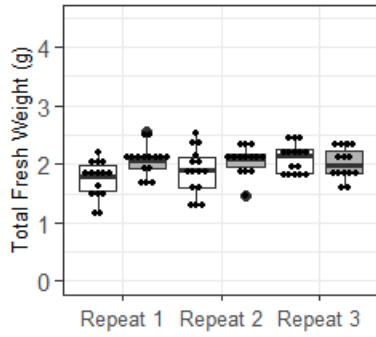

**Fig. S5. Effect of RHG5 and RHG12 on juvenile maize growth under normal temperature conditions.** The two identified PGPR strains, *Bosea* RHG5 and *Pseudoduganella* RHG12, were used to inoculate maize seedlings and their effect on the total (shoot and root) fresh weight was analyzed when maize was grown under control temperature conditions. Total fresh weight of bacterial and mock inoculated ( $n = 15$ ) plants were measured and compared in three repeats. A two-sample Student's *t*-test was used to detect significant effects of the inoculation. The white box represents the control condition, whereas the grey box represents the treated conditions. Individual datapoints are shown as black dots.

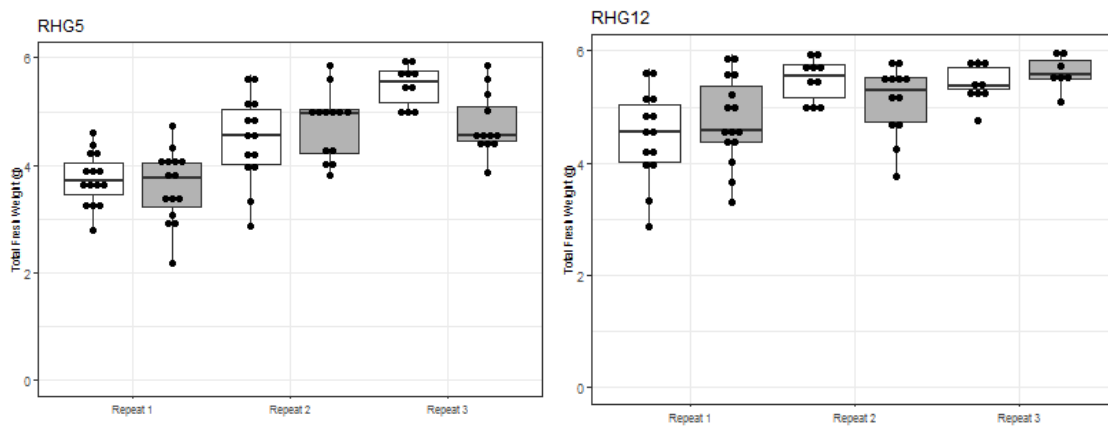

**Table S1.** Soil characteristics of the field soil used in the different experiments (determined by ILVO).

| <b>Analysis</b> | <b>Merelbeke soil</b> |
|-----------------|-----------------------|
| N totaal        | 0.11% dry matter (DM) |
| Fe-AmLact       | 45.5 mg/100 g DM      |
| K-AmLact        | 20.2 mg/100 g DM      |
| DS              | 88.1% fresh matter    |
| OC              | 1.12% DM              |
| pH KCl          | 6.16                  |
| Mg-AmLact       | 21.6 mg/100 g DM      |
| Ca-AmLact       | 114.4 mg/100 g DM     |
| Mn-AmLact       | 13 mg/100 g DM        |
| Na-AmLact       | < 1.92 mg/100 g DM    |
| P-AmLact        | 22 mg/100 g DM        |



**Table S2.** Composition of bacterial growth media used for isolation approaches

| <b>Media</b>           | <b>Composition</b>                                      |
|------------------------|---------------------------------------------------------|
| <b>For plating</b>     | 15 g/l agar (Sigma-Aldrich)                             |
| <b>R2A (pH 7)</b>      | 0.5 g/l Proteose peptone (Sigma-Aldrich)                |
|                        | 0.5 g/l Casamino acids (Thermo Fisher)                  |
|                        | 0.5 g/l Yeast extract (Sigma-Aldrich)                   |
|                        | 0.5 g/l Dextrose (Sigma-Aldrich)                        |
|                        | 0.5 g/l Soluble starch (Thermo Fisher)                  |
|                        | 0.3 g/l K <sub>2</sub> HPO <sub>4</sub> (Sigma-Aldrich) |
|                        | 0.5 g/l MgSO <sub>4</sub> (Sigma-Aldrich)               |
|                        | 0.3 g/l Sodium pyruvate (Thermo Fisher)                 |
| <b>TSB (pH 7.3)</b>    | 17 g/l Pancreatic Digest of Casein (Sigma-Aldrich)      |
|                        | 3 g/l Papaic Digest of Soybean (Sigma-Aldrich)          |
|                        | 5 g/l NaCl (Chem lab)                                   |
|                        | 2.5 g/l K <sub>2</sub> HPO <sub>4</sub> (Sigma-Aldrich) |
|                        | 2.5 g/l Dextrose (Sigma-Aldrich)                        |
| <b>King's B (pH 7)</b> | 15 g proteose peptone #2 (DIFCO)                        |
|                        | 1.5 g/l K <sub>2</sub> HPO <sub>4</sub> (Sigma-Aldrich) |
|                        | 5 ml MgSO <sub>4</sub> (1 M; sterile)                   |

**Table S3.** Read counts of the different samples (before and after filtering) in each microbiome experiment. During filtering, chloroplasts and mitochondria reads were removed, together with reads belonging to low abundant ASVs (< 2 counts/ASV in at least five samples)

| <b>Experiment</b> | <b>Samples</b>           | <b>Reads per sample</b> | <b>Reads per sample after filtering</b> | <b>ASVs per sample</b> |
|-------------------|--------------------------|-------------------------|-----------------------------------------|------------------------|
| I                 | Bulk soil                | 120,092                 | 95,139                                  | 925                    |
|                   | Root endosphere          | 310,122                 | 62,591                                  | 466                    |
| II                | Bulk soil                | 58,412                  | 57,960                                  | 685                    |
|                   | Root endosphere          | 286,594                 | 94,250                                  | 608                    |
| III               | Bulk soil                | 57,129                  | 56,717                                  | 426                    |
|                   | Root endosphere          | 233,639                 | 24,731                                  | 219                    |
|                   | <i>In vitro</i>          | 235,120                 | 1,920                                   | 21                     |
| IV                | Bulk control             | 23,814                  | 23,579                                  | 814                    |
|                   | Bulk chilling            | 44,789                  | 44,694                                  | 544                    |
|                   | Root endosphere control  | 136,529                 | 35,846                                  | 878                    |
|                   | Root endosphere chilling | 102,533                 | 20,544                                  | 584                    |
| V                 | Bulk control             | 19,871                  | 19,786                                  | 636                    |
|                   | Bulk chilling            | 16,274                  | 16,220                                  | 461                    |
|                   | Root endosphere control  | 92,465                  | 30,933                                  | 530                    |
|                   | Root endosphere chilling | 124,026                 | 38,947                                  | 497                    |

**Table S4.** Bacterial communities of bulk soil and root endosphere in field- and pot-grown maize of experiments I and II. Relative abundance  $\pm$  SE (%) are shown; Phyla are highlighted. Asterisks represent *P* values of significant difference in the root endosphere compared to bulk soil: \* *P* <0.05, \*\* *P* <0.001; \*\*\* *P* <0.001.

| Family                                | Experiment I     |                     | Experiment II    |                     |
|---------------------------------------|------------------|---------------------|------------------|---------------------|
|                                       | Bulk             | Endosphere          | Bulk             | Endosphere          |
| <i>Proteobacteria</i>                 | 26.78 $\pm$ 0.70 | 52.42 $\pm$ 2.14*** | 21.69 $\pm$ 0.45 | 46.09 $\pm$ 3.52*** |
| <i>Oxalobacteraceae</i>               | 2.61 $\pm$ 0.76  | 27.77 $\pm$ 3.16*** | 0.14 $\pm$ 0.01  | 3.62 $\pm$ 0.35***  |
| <i>Comamonadaceae</i>                 | 0.91 $\pm$ 0.13  | 9.01 $\pm$ 1.46***  | 0.36 $\pm$ 0.09  | 8.66 $\pm$ 0.95***  |
| <i>Rhizobiaceae</i>                   | 0.02 $\pm$ 0.01  | 0.84 $\pm$ 0.14***  | 0.00 $\pm$ 0.00  | 1.25 $\pm$ 0.21***  |
| <i>Caulobacteraceae</i>               | 0.16 $\pm$ 0.03  | 0.64 $\pm$ 0.06***  | 0.01 $\pm$ 0.01  | 1.77 $\pm$ 0.26***  |
| <i>BIRii41</i>                        | 0.24 $\pm$ 0.04  | 3.10 $\pm$ 0.65***  | 0.89 $\pm$ 0.14  | 3.24 $\pm$ 0.32***  |
| <i>Cellvibrionaceae</i>               | 0.01 $\pm$ 0.01  | 0.74 $\pm$ 0.19***  | -                | -                   |
| <i>Bradyrhizobiaceae</i>              | 0.31 $\pm$ 0.04  | 0.85 $\pm$ 0.12***  | 0.33 $\pm$ 0.11  | 1.02 $\pm$ 0.10     |
| <i>Hyphomicrobiaceae</i>              | 0.59 $\pm$ 0.14  | 1.41 $\pm$ 0.16***  | 0.48 $\pm$ 0.05  | 1.74 $\pm$ 0.05***  |
| <i>Haliangiaceae</i>                  | 0.50 $\pm$ 0.05  | 0.64 $\pm$ 0.07***  | 0.70 $\pm$ 0.15  | 0.52 $\pm$ 0.08     |
| <i>Sphingomonadaceae</i>              | 1.61 $\pm$ 0.27  | 0.64 $\pm$ 0.05     | 0.47 $\pm$ 0.08  | 1.38 $\pm$ 0.29***  |
| <i>Xanthomonadales_Incertae_Sedis</i> | 0.91 $\pm$ 0.05  | 1.11 $\pm$ 0.26***  | 1.45 $\pm$ 0.17  | 3.97 $\pm$ 0.39***  |
| <i>Xanthomonadaceae</i>               | 2.59 $\pm$ 0.45  | 1.37 $\pm$ 0.15     | 1.03 $\pm$ 0.11  | 5.31 $\pm$ 1.68***  |
| <i>Polyangiaceae</i>                  | 0.00 $\pm$ 0.00  | 1.17 $\pm$ 0.17***  | 0.19 $\pm$ 0.06  | 0.27 $\pm$ 0.05     |
| <i>Enterobacteriaceae</i>             | 0.04 $\pm$ 0.01  | 0.39 $\pm$ 0.07***  | 0.00 $\pm$ 0.00  | 5.59 $\pm$ 3.77***  |
| <i>Oceanospirillaceae</i>             | 0.01 $\pm$ 0.01  | 0.01 $\pm$ 0.01     | 0.08 $\pm$ 0.02  | 0.56 $\pm$ 0.11***  |
| <i>Pseudomonadaceae</i>               | 0.15 $\pm$ 0.04  | 0.27 $\pm$ 0.06**   | 0.20 $\pm$ 0.04  | 0.63 $\pm$ 0.16***  |
| <i>Rhodospirillaceae</i>              | 0.53 $\pm$ 0.04  | 0.26 $\pm$ 0.02     | 0.11 $\pm$ 0.02  | 0.74 $\pm$ 0.09***  |
| <i>Actinobacteria</i>                 | 4.95 $\pm$ 0.72  | 27.19 $\pm$ 2.92*** | 0.77 $\pm$ 0.12  | 5.68 $\pm$ 0.64***  |
| <i>Streptomycetaceae</i>              | 0.06 $\pm$ 0.01  | 22.67 $\pm$ 3.18*** | 0.04 $\pm$ 0.02  | 5.08 $\pm$ 0.58***  |
| <i>Thermomonosporaceae</i>            | 0.01 $\pm$ 0.01  | 1.47 $\pm$ 0.07***  | 0.01 $\pm$ 0.01  | 0.34 $\pm$ 0.03     |
| <i>Pseudonocardiaceae</i>             | 0.02 $\pm$ 0.02  | 1.20 $\pm$ 0.21***  | -                | -                   |
| <i>Bacteroidetes</i>                  | 9.49 $\pm$ 0.94  | 13.17 $\pm$ 1.50*** | 16.14 $\pm$ 1.20 | 23.67 $\pm$ 2.15**  |
| <i>Cytophagaceae</i>                  | 2.74 $\pm$ 0.44  | 6.87 $\pm$ 1.01***  | 1.92 $\pm$ 0.17  | 10.49 $\pm$ 1.24*** |
| <i>Flavobacteriaceae</i>              | 0.32 $\pm$ 0.13  | 1.33 $\pm$ 0.11**   | 0.49 $\pm$ 0.09  | 1.23 $\pm$ 0.70*    |
| <i>Chitinophagaceae</i>               | 4.41 $\pm$ 0.40  | 4.16 $\pm$ 0.49*    | 6.80 $\pm$ 0.50  | 6.82 $\pm$ 0.45     |
| <i>Sphingobacteriaceae</i>            | 0.6              | 0.36                | 0.14 $\pm$ 0.04  | 2.82 $\pm$ 1.20***  |
| <i>Cryomorphaceae</i>                 | 0.03 $\pm$ 0.01  | 0.09 $\pm$ 0.02***  | 0.12 $\pm$ 0.03  | 0.66 $\pm$ 0.09***  |
| <i>Chloroflexi</i>                    | 3.74 $\pm$ 0.27  | 2.45 $\pm$ 0.56***  | 3.53 $\pm$ 0.29  | 6.11 $\pm$ 0.87***  |
| <i>Anaerolineaceae</i>                | 0.79 $\pm$ 0.07  | 1.53 $\pm$ 0.39***  | 2.08 $\pm$ 0.26  | 5.85 $\pm$ 0.84***  |
| <i>Firmicutes</i>                     | 1.54 $\pm$ 0.26  | 1.65 $\pm$ 0.23***  | 1.63 $\pm$ 0.23  | 2.59 $\pm$ 0.67*    |
| <i>Paenibacillaceae</i>               | 0.06 $\pm$ 0.02  | 0.83 $\pm$ 0.23***  | 0.01 $\pm$ 0.01  | 0.01 $\pm$ 0.01     |
| <i>Erysipelotrichaceae</i>            | 0.00 $\pm$ 0.00  | 0.66 $\pm$ 0.08***  | 0.00 $\pm$ 0.00  | 2.40 $\pm$ 0.70***  |
| <i>Fibrobacteres</i>                  | 0.00 $\pm$ 0.00  | 0.08 $\pm$ 0.03***  | 0.05 $\pm$ 0.02  | 0.45 $\pm$ 0.03***  |
| <i>Verrucomicrobia</i>                | 5.60 $\pm$ 0.43  | 1.20 $\pm$ 0.16     | 11.55 $\pm$ 0.71 | 6.20 $\pm$ 0.69*    |
| <i>Opitutaceae</i>                    | 0.29 $\pm$ 0.05  | 0.38 $\pm$ 0.07**   | 0.69 $\pm$ 0.10  | 1.60 $\pm$ 0.24***  |
| <i>Verrucomicrobiaceae</i>            | 0.24 $\pm$ 0.05  | 0.24 $\pm$ 0.06     | 0.23 $\pm$ 0.04  | 2.33 $\pm$ 0.30***  |
| <i>Acidobacteria</i>                  | 28.77 $\pm$ 0.70 | 1.34 $\pm$ 0.13***  | 29.26 $\pm$ 0.86 | 3.19 $\pm$ 0.47*    |
| <i>Spirochaetae</i>                   | -                | -                   | 0.17 $\pm$ 0.03  | 1.62 $\pm$ 0.34***  |
| <i>Leptospiraceae</i>                 | -                | -                   | 0.12 $\pm$ 0.03  | 0.73 $\pm$ 0.09**   |
| <i>Spirochaetaceae</i>                | -                | -                   | 0.05 $\pm$ 0.02  | 0.89 $\pm$ 0.33**   |

**Table S5.** Bacterial seed endophytes (experiment III). ASVs of the root endosphere of the *in vitro*-grown plants, assigned taxonomy of each ASV, and the mean relative abundance in the bulk soil, the root endosphere of the soil-grown plants and the *in vitro*-grown plants (in %  $\pm$  SE)

| Phylum                | Family                     | Genus                   | ASV_ID               | Bulk soil       | Endosphere of soil-grown plants | Endosphere <i>in vitro</i> -grown plants |                  |
|-----------------------|----------------------------|-------------------------|----------------------|-----------------|---------------------------------|------------------------------------------|------------------|
| <i>Bacteroidetes</i>  | <i>Flavobacteriaceae</i>   | <i>Chryseobacterium</i> | ID_108               | 0.00 $\pm$ 0.00 | 0.18 $\pm$ 0.02                 | 13.06 $\pm$ 0.59                         |                  |
|                       |                            | <i>Flavobacterium</i>   | ID_796               | 0.00 $\pm$ 0.00 | 0.00 $\pm$ 0.00                 | 3.16 $\pm$ 0.62                          |                  |
|                       | <i>Sphingobacteriaceae</i> | <i>Sphingobacterium</i> | ID_282               | 0.00 $\pm$ 0.00 | 0.02 $\pm$ 0.01                 | 2.07 $\pm$ 0.26                          |                  |
|                       |                            |                         | ID_696               | 0.00 $\pm$ 0.00 | 0.01 $\pm$ 0.01                 | 1.41 $\pm$ 0.48                          |                  |
| <i>Firmicutes</i>     | <i>Paenibacillaceae</i>    | <i>Paenibacillus</i>    | ID_291               | 0.00 $\pm$ 0.00 | 0.00 $\pm$ 0.00                 | 3.68 $\pm$ 0.34                          |                  |
| <i>Proteobacteria</i> | <i>Rhizobiaceae</i>        | <i>Shinella</i>         | ID_102               | 0.00 $\pm$ 0.00 | 0.00 $\pm$ 0.00                 | 2.69 $\pm$ 0.67                          |                  |
|                       | <i>Phyllobacteriaceae</i>  | <i>Phyllobacterium</i>  | ID_1015              | 0.00 $\pm$ 0.00 | 0.00 $\pm$ 0.00                 | 1.83 $\pm$ 0.64                          |                  |
|                       | <i>Brucellaceae</i>        | <i>Brucella</i>         | ID_685               | 0.00 $\pm$ 0.00 | 0.00 $\pm$ 0.00                 | 1.63 $\pm$ 0.55                          |                  |
|                       | <i>Oxalobacteraceae</i>    | <i>Pseudoduganella</i>  | ID_668               | 0.00 $\pm$ 0.00 | 0.00 $\pm$ 0.00                 | 2.45 $\pm$ 0.56                          |                  |
|                       | <i>Comamonadaceae</i>      | <i>Curvibacter</i>      | ID_618               | 0.00 $\pm$ 0.00 | 0.00 $\pm$ 0.00                 | 2.08 $\pm$ 0.69                          |                  |
|                       | <i>Enterobacteriaceae</i>  | NA                      | ID_4                 | 0.07 $\pm$ 0.05 | 0.86 $\pm$ 0.15                 | 8.69 $\pm$ 0.80                          |                  |
|                       | <i>Moraxellaceae</i>       | <i>Psychrobacter</i>    | <i>Acinetobacter</i> | ID_84           | 0.00 $\pm$ 0.00                 | 0.19 $\pm$ 0.03                          | 16.73 $\pm$ 1.00 |
|                       |                            |                         |                      | ID_142          | 0.00 $\pm$ 0.00                 | 0.16 $\pm$ 0.04                          | 11.98 $\pm$ 0.62 |
|                       |                            |                         |                      | ID_228          | 0.00 $\pm$ 0.00                 | 0.04 $\pm$ 0.04                          | 9.23 $\pm$ 1.20  |
|                       |                            |                         |                      | ID_261          | 0.00 $\pm$ 0.00                 | 0.00 $\pm$ 0.00                          | 4.51 $\pm$ 1.23  |
|                       |                            |                         |                      | ID_659          | 0.00 $\pm$ 0.00                 | 0.00 $\pm$ 0.00                          | 2.75 $\pm$ 1.26  |
|                       | <i>Pseudomonadaceae</i>    | <i>Pseudomonas</i>      | ID_738               | 0.00 $\pm$ 0.00 | 0.00 $\pm$ 0.00                 | 1.83 $\pm$ 0.64                          |                  |
|                       |                            |                         | ID_286               | 0.00 $\pm$ 0.00 | 0.00 $\pm$ 0.00                 | 4.86 $\pm$ 1.37                          |                  |
|                       |                            |                         | ID_66                | 0.03 $\pm$ 0.03 | 0.01 $\pm$ 0.01                 | 3.27 $\pm$ 1.50                          |                  |
|                       | <i>Xanthomonadaceae</i>    | <i>Stenotrophomonas</i> | ID_371               | 0.00 $\pm$ 0.00 | 0.34 $\pm$ 0.14                 | 0.21 $\pm$ 0.21                          |                  |
| ID_759                |                            |                         | 0.00 $\pm$ 0.00      | 0.00 $\pm$ 0.00 | 1.89 $\pm$ 0.87                 |                                          |                  |

**Table S6.** Results of the PERMANOVA test on the bulk soil and root endosphere samples of experiments IV and V. A PERMANOVA analysis was carried out on the Bray-Curtis dissimilarity matrices of the separate compartments (bulk soil or root endosphere) of both experiments IV and V. Results are listed in the table (vegan::Adonis(dissimilarity\_matrix ~ Temperature))

| <b>Compartment</b>   | <b>R<sup>2</sup></b> | <b>P-value</b> |
|----------------------|----------------------|----------------|
| <i>Experiment IV</i> |                      |                |
| Bulk Soil            | 0.33675              | 0.001          |
| Endosphere           | 0.39649              | 0.001          |
| <i>Experiment V</i>  |                      |                |
| Bulk Soil            | 0.33238              | 0.001          |
| Endosphere           | 0.47981              | 0.001          |

**Table S7.** Relative abundance of bacterial communities of the temperature experiments IV and V. Most abundant families and phyla in the root endosphere of maize grown under control and chilling temperature conditions, analysis was performed both at phylum and at family level. Asterisks represent *P* values of significant enrichment in the root endosphere under chilling conditions compared to the control conditions: \* *P* <0.05, \*\* *P* <0.001; \*\*\* *P* <0.001

| Family                     | Bulk         |              | Endosphere   |                 |
|----------------------------|--------------|--------------|--------------|-----------------|
|                            | Control      | Cold         | Control      | Cold            |
| <b>Experiment IV</b>       |              |              |              |                 |
| <i>Proteobacteria</i>      | 21.64 ± 1.34 | 24.18 ± 0.61 | 49.41 ± 1.56 | 71.48 ± 2.56    |
| <i>Oxalobacteraceae</i>    | 0.64 ± 0.49  | 1.24 ± 0.18  | 18.33 ± 2.64 | 23.81 ± 3.20    |
| <i>Comamonadaceae</i>      | 1.00 ± 0.16  | 1.34 ± 0.18  | 11.09 ± 0.95 | 20.70 ± 1.69    |
| <i>Rhizobiaceae</i>        | 0.01 ± 0.01  | 0.03 ± 0.01  | 1.66 ± 0.31  | 1.01 ± 0.14     |
| <i>Caulobacteraceae</i>    | 0.01 ± 0.01  | 0.16 ± 0.04  | 1.20 ± 0.17  | 1.43 ± 0.34     |
| <i>Bfrii41</i>             | 0.46 ± 0.08  | 0.85 ± 0.08  | 3.94 ± 0.46  | 3.66 ± 0.50     |
| <i>Bradyrhizobiaceae</i>   | 0.79 ± 0.17  | 0.48 ± 0.07  | 1.61 ± 0.13  | 1.24 ± 0.10     |
| <i>Sphingomonadaceae</i>   | 0.26 ± 0.10  | 0.16 ± 0.04  | 1.88 ± 0.32  | 2.41 ± 0.40     |
| <i>Xanthomonadaceae</i>    | 0.84 ± 0.16  | 1.52 ± 0.12  | 1.86 ± 0.57  | 2.64 ± 0.71     |
| <i>Enterobacteriaceae</i>  | 0.32 ± 0.32  | 0.00 ± 0.00  | 0.23 ± 0.08  | 3.56 ± 1.31     |
| <i>Pseudomonadaceae</i>    | 0.37 ± 0.17  | 0.32 ± 0.03  | 0.81 ± 0.26  | 3.12 ± 1.21***  |
| <i>Polyangiaceae</i>       | 0.08 ± 0.03  | 0.00 ± 0.00  | 0.26 ± 0.09  | 0.88 ± 0.15     |
| <i>Methylophilaceae</i>    | 0.10 ± 0.05  | 0.07 ± 0.02  | 0.73 ± 0.18  | 1.62 ± 0.31     |
| <i>Phyllobacteriaceae</i>  | 0.09 ± 0.05  | 0.06 ± 0.02  | 0.88 ± 0.11  | 1.21 ± 0.23     |
| <i>Actinobacteria</i>      | 5.67 ± 0.82  | 3.34 ± 0.20  | 29.08 ± 1.81 | 8.85 ± 1.73***  |
| <i>Streptomycetaceae</i>   | 0.07 ± 0.05  | 0.05 ± 0.03  | 25.08 ± 1.52 | 6.36 ± 1.38     |
| <i>Pseudonocardiaceae</i>  | 0.08 ± 0.05  | 0.00 ± 0.00  | 0.93 ± 0.23  | 0.60 ± 0.29     |
| <i>Bacteroidetes</i>       | 6.98 ± 0.77  | 13.59 ± 1.31 | 13.17 ± 2.15 | 11.51 ± 1.12    |
| <i>Cytophagaceae</i>       | 2.95 ± 0.50  | 4.04 ± 0.32  | 5.91 ± 0.95  | 5.10 ± 0.73     |
| <i>Flavobacteriaceae</i>   | 0.44 ± 0.10  | 1.34 ± 0.15  | 0.42 ± 0.15  | 0.75 ± 0.19     |
| <i>Chitinophagaceae</i>    | 1.69 ± 0.19  | 4.46 ± 0.52  | 5.57 ± 1.04  | 2.49 ± 0.46***  |
| <i>Sphingobacteriaceae</i> | 0.13 ± 0.09  | 0.51 ± 0.06  | 1.04 ± 0.37  | 2.91 ± 0.66     |
| <i>Verrucomicrobia</i>     | 13.07 ± 0.99 | 7.39 ± 0.40  | 2.30 ± 0.27  | 3.02 ± 0.53     |
| <i>Opitutaceae</i>         | 0.39 ± 0.08  | 0.53 ± 0.07  | 0.77 ± 0.11  | 0.99 ± 0.17     |
| <i>Burkholderiaceae</i>    | 0.02 ± 0.02  | 0.00 ± 0.00  | 0.75 ± 0.34  | 0.71 ± 0.29     |
| <i>Cellvibrionaceae</i>    | 0.05 ± 0.04  | 0.29 ± 0.05  | 0.06 ± 0.02  | 0.67 ± 0.19**   |
| <i>Chloroflexi</i>         | 6.34 ± 0.45  | 4.18 ± 0.13  | 2.35 ± 0.29  | 1.31 ± 0.30     |
| <i>Anaerolineaceae</i>     | 2.67 ± 0.40  | 1.43 ± 0.06  | 1.59 ± 0.25  | 0.63 ± 0.18***  |
| <i>Acidobacteria</i>       | 27.02 ± 2.65 | 30.87 ± 2.09 | 1.90 ± 0.23  | 2.02 ± 0.46     |
| <i>Blastocatellaceae</i>   | 10.11 ± 1.79 | 14.07 ± 1.10 | 0.49 ± 0.05  | 0.61 ± 0.17     |
| <i>Thaumarchaeota</i>      | 0.96 ± 0.13  | 0.52 ± 0.03  | 0.26 ± 0.03  | 0.40 ± 0.06**   |
| <i>Firmicutes</i>          | 0.68 ± 0.15  | 0.67 ± 0.08  | 0.61 ± 0.14  | 0.33 ± 0.11     |
| <i>Planctomycetes</i>      | 5.02 ± 0.29  | 2.57 ± 0.20  | 0.45 ± 0.13  | 0.29 ± 0.09     |
| <b>Experiment V</b>        |              |              |              |                 |
| <i>Proteobacteria</i>      | 30.81 ± 0.51 | 18.33 ± 0.67 | 72.73 ± 1.28 | 77.41 ± 1.06*** |
| <i>Oxalobacteraceae</i>    | 1.61 ± 0.17  | 1.01 ± 0.09  | 34.17 ± 2.47 | 21.84 ± 1.39*** |
| <i>Comamonadaceae</i>      | 2.39 ± 0.16  | 0.95 ± 0.06  | 13.37 ± 1.40 | 16.83 ± 0.68    |
| <i>Rhizobiaceae</i>        | 0.00 ± 0.00  | 0.00 ± 0.00  | 1.48 ± 0.18  | 2.16 ± 0.20     |
| <i>Caulobacteraceae</i>    | 0.33 ± 0.07  | 0.02 ± 0.01  | 1.59 ± 0.23  | 2.64 ± 0.18     |
| <i>Bfrii41</i>             | 0.27 ± 0.05  | 0.09 ± 0.09  | 1.19 ± 0.22  | 3.86 ± 0.23     |
| <i>Bradyrhizobiaceae</i>   | 0.47 ± 0.07  | 0.33 ± 0.03  | 1.37 ± 0.10  | 1.51 ± 0.06     |
| <i>Sphingomonadaceae</i>   | 1.29 ± 0.11  | 0.67 ± 0.04  | 4.08 ± 0.25  | 5.39 ± 0.35     |

|                            |              |              |              |                 |
|----------------------------|--------------|--------------|--------------|-----------------|
| <i>Xanthomonadaceae</i>    | 1.80 ± 0.18  | 1.25 ± 0.06  | 4.05 ± 1.21  | 5.49 ± 0.71     |
| <i>Enterobacteriaceae</i>  | 0.00 ± 0.00  | 0.00 ± 0.00  | 0.27 ± 0.17  | 2.07 ± 0.60     |
| <i>Pseudomonadaceae</i>    | 0.76 ± 0.20  | 0.24 ± 0.08  | 4.28 ± 1.25  | 5.72 ± 1.44     |
| <i>Polyangiaceae</i>       | 0.00 ± 0.00  | 0.00 ± 0.00  | 0.66 ± 0.07  | 0.60 ± 0.04     |
| <i>Methylophilaceae</i>    | 0.48 ± 0.13  | 0.06 ± 0.04  | 0.30 ± 0.05  | 1.70 ± 0.20***  |
| <i>Phyllobacteriaceae</i>  | 0.04 ± 0.03  | 0.00 ± 0.00  | 0.79 ± 0.07  | 1.05 ± 0.12     |
| <i>Actinobacteria</i>      | 2.58 ± 0.23  | 1.17 ± 0.16  | 14.25 ± 0.60 | 3.44 ± 0.21***  |
| <i>Streptomycetaceae</i>   | 0.00 ± 0.00  | 0.00 ± 0.00  | 9.31 ± 0.77  | 2.31 ± 0.22***  |
| <i>Pseudonocardiaceae</i>  | 0.00 ± 0.00  | 0.00 ± 0.00  | 1.46 ± 0.36  | 0.22 ± 0.04***  |
| <i>Bacteroidetes</i>       | 9.61 ± 0.49  | 9.01 ± 0.58  | 10.26 ± 0.88 | 14.59 ± 0.86*** |
| <i>Cytophagaceae</i>       | 1.28 ± 0.09  | 1.42 ± 0.20  | 1.64 ± 0.26  | 4.84 ± 0.36***  |
| <i>Flavobacteriaceae</i>   | 0.65 ± 0.07  | 0.67 ± 0.12  | 0.52 ± 0.07  | 1.99 ± 0.22***  |
| <i>Chitinophagaceae</i>    | 5.85 ± 0.33  | 4.60 ± 0.25  | 4.36 ± 0.35  | 1.81 ± 0.10***  |
| <i>Sphingobacteriaceae</i> | 0.19 ± 0.02  | 0.25 ± 0.05  | 3.44 ± 0.44  | 5.01 ± 0.63     |
| <i>Verrucomicrobia</i>     | 8.36 ± 0.45  | 10.04 ± 0.57 | 1.01 ± 0.19  | 1.93 ± 0.25     |
| <i>Opitutaceae</i>         | 0.17 ± 0.04  | 0.29 ± 0.07  | 0.25 ± 0.05  | 0.78 ± 0.11***  |
| <i>Burkholderiaceae</i>    | 0.01 ± 0.01  | 0.01 ± 0.01  | 2.38 ± 0.65  | 1.16 ± 0.34     |
| <i>Cellvibrionaceae</i>    | 0.02 ± 0.01  | 0.04 ± 0.03  | 0.28 ± 0.03  | 1.64 ± 0.18***  |
| <i>Chloroflexi</i>         | 2.32 ± 0.20  | 1.96 ± 0.13  | 0.22 ± 0.03  | 0.55 ± 0.06     |
| <i>Anaerolineaceae</i>     | 0.90 ± 0.17  | 0.99 ± 0.21  | 0.11 ± 0.02  | 0.44 ± 0.04***  |
| <i>Acidobacteria</i>       | 29.11 ± 0.77 | 44.59 ± 1.03 | 0.92 ± 0.19  | 0.53 ± 0.08***  |
| <i>Blastocatellaceae</i>   | 14.08 ± 0.63 | 28.20 ± 0.91 | 0.26 ± 0.06  | 0.13 ± 0.01***  |
| <i>Thaumarchaeota</i>      | 2.72 ± 0.40  | 2.44 ± 0.33  | 0.06 ± 0.01  | 0.03 ± 0.01***  |
| <i>Firmicutes</i>          | 0.55 ± 0.07  | 0.54 ± 0.07  | 0.14 ± 0.05  | 0.15 ± 0.03***  |
| <i>Planctomycetes</i>      | 1.82 ± 0.15  | 2.08 ± 0.06  | 0.02 ± 0.01  | 0.01 ± 0.01***  |

**Table S8. Bacterial collection**

**A** Summary of all the different phyla and families represented by isolates in the bacterial collection. **B** Bacterial isolates of the bacterial collection with the assigned taxonomy using the SILVA database. **C** The 16S rRNA sequence of the different isolates of the bacterial collection.

(Additional file 2: Excel sheet)



**Table S9. Effect and taxonomy of the screened strains.** Increase or decrease in fresh root, shoot, and total weight is indicated as percentage comparing the bacterial treated to the mock treated maize plants; asterisks represent *P* values: \* *P* <0.05; \*\* *P* <0.001; \*\*\* *P* <0.001. Two promising PGPR strains were identified and are in **bold**.

| Phylum                | Family                     | Genus                   | Treatment   | Repeat   | Shoot        | Root          | Total        |
|-----------------------|----------------------------|-------------------------|-------------|----------|--------------|---------------|--------------|
| <i>Bacteroidetes</i>  | <i>Cytophagaceae</i>       | <i>Dyadobacter</i>      | RHG21       | 1        | 11.2         | -0.7          | 2.7          |
|                       |                            |                         | RHG21       | 2        | -19.5***     | 37.3***       | 9.3          |
|                       |                            |                         | RHG21       | 3        | 98.9***      | 119.7***      | 111.8***     |
|                       | <i>Flavobacteriaceae</i>   | <i>Chryseobacterium</i> | RHG22       | 2        | 30.2***      | -7.5          | 9.2          |
|                       |                            |                         | RHG22       | 1        | -2.3         | -4            | -3.3**       |
|                       |                            |                         | RHG22       | 2        | -6.7         | -12.1**       | -10          |
|                       |                            | <i>Flavobacterium</i>   | RHG23       | 2        | 19.3**       | 16.8          | 17.7***      |
|                       |                            |                         | RHG23       | 1        | -36.2***     | -28.7***      | -32.3*       |
|                       |                            |                         | RHG23       | 2        | 19.3**       | 16.8          | 17.7***      |
|                       | <i>Sphingobacteriaceae</i> | <i>Mucilaginibacter</i> | RHG24       | 3        | 7.7          | -7.4          | -1.4         |
|                       |                            |                         | RHG24       | 1        | -7.3         | 15            | 6.4***       |
|                       |                            |                         | RHG24       | 2        | 21.4*        | 32.8**        | 28***        |
|                       |                            | <i>Pedobacter</i>       | RHG25       | 1        | -14.9        | -25.8***      | -21.6        |
|                       |                            |                         | RHG25       | 2        | 9            | 3.6           | 5.7*         |
|                       |                            |                         | RHG26       | 3        | -10.1        | -13.7         | -12.3***     |
|                       |                            |                         | RHG26       | 1        | 40.2***      | 71.2***       | 59.3         |
|                       |                            |                         | RHG27       | 2        | -20.3*       | -8.8          | 15.9         |
|                       |                            |                         | RHG27       | 1        | -1.5         | -1.7          | -1.6         |
| <i>Firmicutes</i>     | <i>Paenibacillaceae</i>    | <i>Paenibacillus</i>    | RHG28       | 1        | -12.2        | 38.5***       | 19           |
|                       |                            |                         | RHG28       | 2        | 14.3         | 6.1           | 9.6          |
| <i>Proteobacteria</i> | <i>Bradyrhizobiaceae</i>   | <i>Bosea</i>            | <b>RHG5</b> | <b>2</b> | <b>32.9*</b> | <b>23.9</b>   | <b>28.6*</b> |
|                       |                            |                         | <b>RHG5</b> | <b>3</b> | <b>5.2</b>   | <b>25.3**</b> | <b>15.4*</b> |
|                       |                            |                         | <b>RHG5</b> | <b>1</b> | <b>1.8*</b>  | <b>18.3</b>   | <b>12.6*</b> |
|                       |                            |                         | RHG6        | 1        | -0.7         | 6.8           | 4.6          |
|                       |                            |                         | RHG6        | 2        | 62.7***      | 59.6***       | 60.9***      |
|                       |                            |                         | RHG6        | 3        | -25.1**      | -18.5*        | -20.5**      |
|                       | <i>Burkholderiaceae</i>    | <i>Burkholderia</i>     | RHG7        | 1        | -8.9         | 0.8           | -3.9         |
|                       |                            |                         | RHG7        | 2        | 20.4*        | -2.7          | 7.6          |
|                       |                            |                         | RHG8        | 2        | 12           | 18*           | 15.3         |
|                       |                            |                         | RHG8        | 1        | 3.4          | -20.3**       | -8.8         |
|                       | <i>Caulobacteraceae</i>    | <i>Brevundimonas</i>    | RHG2        | 1        | 70.3***      | 58.5***       | 63.4***      |
|                       |                            |                         | RHG2        | 2        | -21.8**      | -11.4         | -15.8**      |
|                       |                            |                         | RHG2        | 3        | 70.3***      | 58.5***       | 63.4***      |
|                       |                            |                         | RHG3        | 1        | -30.4***     | -30.5***      | -30.5***     |
|                       |                            |                         | RHG3        | 2        | -48.1***     | -34.2***      | -39.6***     |
|                       |                            |                         | RHG3        | 3        | -44.5***     | -39.3***      | -41.3***     |
|                       |                            |                         | RHG4        | 2        | 2.5          | -1.4          | -0.4         |

|                           |                         |              |          |              |                |                |
|---------------------------|-------------------------|--------------|----------|--------------|----------------|----------------|
|                           |                         | RHG4         | 1        | -3.8         | 17.9           | 7.6            |
|                           | <i>Caulobacter</i>      | RHG1         | 2        | 32.9***      | 23.9           | 28.6***        |
|                           |                         | RHG1         | 3        | 5.2*         | 25.3***        | 15.4           |
|                           |                         | RHG1         | 1        | 64.3***      | 16.6*          | 32.7***        |
| <i>Comamonadaceae</i>     | <i>Polaromonas</i>      | RHG10        | 3        | -14.6        | 5.3            | -3             |
|                           |                         | RHG10        | 1        | 16.6         | 12.1           | 13.8           |
|                           | <i>Variovorax</i>       | RHG9         | 1        | 5.5          | -1.8           | 0.6            |
|                           |                         | RHG9         | 2        | 30**         | -27***         | -1.7           |
| <i>Enterobacteriaceae</i> | <i>Pantoea</i>          | RHG11        | 2        | 3.9          | 4.9            | 4.4**          |
| <i>Enterobacteriaceae</i> | <i>Pantoea</i>          | RHG11        | 1        | -11          | -16**          | -14.1**        |
| <i>Oxalobacteraceae</i>   | <i>Pseudoduganella</i>  | <b>RGH12</b> | <b>1</b> | <b>64.3*</b> | <b>16.6***</b> | <b>32.7***</b> |
|                           |                         | <b>RGH12</b> | <b>2</b> | <b>26.7*</b> | <b>66.2***</b> | <b>45.8***</b> |
|                           |                         | <b>RGH12</b> | <b>3</b> | <b>-6.5</b>  | <b>51.8***</b> | <b>23***</b>   |
| <i>Pseudomonadaceae</i>   | <i>Pseudomonas</i>      | RHG13        | 2        | -53.7***     | -58.6***       | -56.9***       |
|                           |                         | RHG13        | 1        | 19.3         | 6.3            | 10.8***        |
|                           |                         | RHG14        | 2        | 38.9**       | 41.4**         | 40.5           |
|                           |                         | RHG14        | 1        | -9.4         | -15.7*         | -12.6          |
|                           |                         | RHG15        | 2        | -12.3*       | -8.9           | -10**          |
|                           |                         | RHG15        | 1        | -34.4*       | 13.8***        | -11.2*         |
|                           |                         | RHG16        | 1        | 22.7**       | 0.3            | 7.6***         |
|                           |                         | RHG16        | 2        | -27.6***     | -18.9**        | -21.6***       |
|                           |                         | RHG16        | 3        | 2.9          | -13.2          | -6.2           |
| <i>Rhizobiaceae</i>       | <i>Rhizobium</i>        | RHG17        | 1        | -2.1         | 18.8*          | 12.8           |
|                           |                         | RHG17        | 2        | 43.7**       | 29.4*          | 34.8**         |
| <i>Xanthomonadaceae</i>   | <i>Rhodanobacter</i>    | RHG18        | 1        | 21.4**       | 36***          | 30.3***        |
|                           |                         | RHG18        | 2        | 3            | -0.4           | 1              |
|                           | <i>Stenotrophomonas</i> | RHG19        | 2        | 30.8***      | 42.8***        | 38.2           |
|                           |                         | RHG19        | 1        | -19.4**      | -19.8**        | -19.6***       |
|                           |                         | RHG20        | 2        | 30.5***      | 10.8           | 19.5**         |
|                           |                         | RHG20        | 1        | 1.8          | 18.3**         | 12.6**         |

---

**Table S10: Relative abundance of ID\_10 in experiments IV and V.** The relative abundance of ID\_10 is shown in % ( $\pm$ SE). Asterisks represent *P* values: \* *P* <0.05, \*\* *P* <0.001, and \*\*\* *P* <0.001, to indicate a significant enrichment between the bulk soil and the endosphere under chilling or control temperature conditions.

| Sample ID_10  | Bulk soil         |                   | Root endosphere       |                       |
|---------------|-------------------|-------------------|-----------------------|-----------------------|
|               | Control           | Chilling          | Control               | Chilling              |
| Experiment IV | 0 $\pm$ 0         | 0.018 $\pm$ 0.018 | 3.79 $\pm$ 0.80 (***) | 1.84 $\pm$ 0.54 (***) |
| Experiment V  | 0.080 $\pm$ 0.040 | 0.023 $\pm$ 0.023 | 3.79 $\pm$ 0.80 (***) | 1.18 $\pm$ 0.11       |
